# Supplementary material
Source: publisher site journal article supplement (https://www.dovepress.com/article/513407)
Supplement: Supplementary file 1 [file 513407%20SUPPLEMENTARY%20TABLE%201.docx]

# SUPPLEMENTARY TABLES

**Supplementary Table 1. Inclusion and Exclusion Criteria**

| **Inclusion criteria** | **Exclusion criteria** |
| --- | --- |
| - ≥40 years of age - Willing to comply with all treatment and follow-up/study procedures, and use only the CLs dispensed by the study investigator for the duration of the study - Correctable through spherocylindrical refraction to 42 letters (0.1 logMAR) or better (distance, high contrast) in each eye - Clear central corneas and free of any anterior segment disorders - Able to wear current CLs for ≥12 hours per day, ≥4 days per week - Adapted, habitual wearers of MFCLs in each eye for ≥6 months prior to screening - Required distance lens correction from +3.00 to -6.00D in each eye - Presbyopic and required near add correction from +0.75 to +2.50D in each eye - Internet access to complete an online survey and able to receive text messages | - Participated in any drug or device clinical investigation within 30 days of the study - A woman of childbearing potentiala and met any one of the following conditions:   - Pregnant   - Planned to become pregnant during the study   - Breastfeeding - Systemic disease currently affecting ocular health, or that could potentially affect ocular healthb during the study - Active ocular disease - Any corneal surgery - Worn gas-permeable CLs within 30 days prior to screening or worn polymethyl-methacrylate CLs within 3 months prior to screening - Wore monovision or toric contact lenses at screening - Not correctable to 32 letters (0.3 logMAR) with bilateral soft multifocal CLs - Ocular astigmatism >1.00D in either eye - Anisometropia (spherical equivalent)  >2.00D - Any Grade ≥2 finding during the screening/dispensing visit slit lamp examination or corneal infiltrates of any grade, or any finding that could† interfere with CL wear - Scarring or neovascularization within the central 6 mm of the corneac - Amblyopic - Used any systemic **or** topical ocular medication that wouldb affect ocular physiology or CL performance - Allergy to any component in the study care products |

aNot surgically sterilized or postmenopausal. bIn the investigator’s opinion. cParticipants with minor peripheral corneal scarring (that did not extend into the central area) that, in the investigator’s opinion, did not interfere with CL wear were eligible for this study.
CL, contact lens; logMAR, logarithm of the minimum angle of resolution; MF, multifocal.
